# Supplementary material for: Long-term impact of a faculty mentoring program in academic medicine
Source: PLOS journal article supplement (doi:10.1371/journal.pone.0207634), 2018-11-29
Supplement: S4 (10.1371/journal.pone.0207634.s004) [file journal.pone.0207634.s004]

# Mass General Mentorship Pilot Program Survey--

\* 1. At this point in your career, please identify your primary departmental appointment:

- Anesthesia
- Dermatology
- Emergency Services
- Medicine
- Neurology
- Neurosurgery
- Obstetrics and Gynecology
- Oral and Maxillofacial Surgery
- Orthopedic Surgery
- Pathology
- Pediatric Surgery
- Pediatrics
- Physical Medicine and Rehabilitation
- Psychiatry
- Radiation Oncology
- Radiology
- Surgery
- Urology

\* 2. Please rank the following according to your present commitment

1-most, 5-least

|                      |                                |
|----------------------|--------------------------------|
| Admin/Committee Work | <input type="text" value="6"/> |
| Patient Care         | <input type="text" value="6"/> |
| Teaching             | <input type="text" value="6"/> |
| Research             | <input type="text" value="6"/> |
| Other                | <input type="text" value="6"/> |

## Mass General Mentorship Pilot Program Survey--

\* 3. At this point in your career, please select your professional degree(s):

MD

MD/PhD

PhD

Please note the scale options with each question

\* 4. Do you have someone at MGH you consider to be a mentor?

Yes

No

5. If yes to the question above, how satisfied are you in being mentored?

too early to tell

not satisfied

mildly satisfied

moderately satisfied

very satisfied

extremely satisfied

not applicable

\* 6. Do you personally have a role model?

Yes

No

Please note the scale and question in each of the options below.

# Mass General Mentorship Pilot Program Survey--

\* 7. How important has it been to you to be mentored in the following areas?

Please note the options include a scale of "not important" to "extremely important." In addition, included are options "too early to tell" and "not applicable"

|                                                                   | too early to tell | not important | mildly important | moderately important | very important | extremely important | not applicable |
|-------------------------------------------------------------------|-------------------|---------------|------------------|----------------------|----------------|---------------------|----------------|
| Ability to give feedback                                          | jn                | jn            | jn               | jn                   | jn             | jn                  | jn             |
| Ability to receive feedback                                       | jn                | jn            | jn               | jn                   | jn             | jn                  | jn             |
| Academic promotion                                                | jn                | jn            | jn               | jn                   | jn             | jn                  | jn             |
| Balancing work and family Life                                    | jn                | jn            | jn               | jn                   | jn             | jn                  | jn             |
| Career planning and advice                                        | jn                | jn            | jn               | jn                   | jn             | jn                  | jn             |
| Career success                                                    | jn                | jn            | jn               | jn                   | jn             | jn                  | jn             |
| Clinical skills                                                   | jn                | jn            | jn               | jn                   | jn             | jn                  | jn             |
| Communication skills                                              | jn                | jn            | jn               | jn                   | jn             | jn                  | jn             |
| Increasing your visibility                                        | jn                | jn            | jn               | jn                   | jn             | jn                  | jn             |
| Integrating research and clinical activities                      | jn                | jn            | jn               | jn                   | jn             | jn                  | jn             |
| Job satisfaction                                                  | jn                | jn            | jn               | jn                   | jn             | jn                  | jn             |
| Knowledge about the HMS and MGH organizational system and culture | jn                | jn            | jn               | jn                   | jn             | jn                  | jn             |
| Leadership skills                                                 | jn                | jn            | jn               | jn                   | jn             | jn                  | jn             |
| Learning how to be a mentor/mentoring skills                      | jn                | jn            | jn               | jn                   | jn             | jn                  | jn             |
| Networking                                                        | jn                | jn            | jn               | jn                   | jn             | jn                  | jn             |
| Opportunities for self reflection                                 | jn                | jn            | jn               | jn                   | jn             | jn                  | jn             |
| Professional connectedness                                        | jn                | jn            | jn               | jn                   | jn             | jn                  | jn             |
| Scientific research/grant writing                                 | jn                | jn            | jn               | jn                   | jn             | jn                  | jn             |
| Self confidence                                                   | jn                | jn            | jn               | jn                   | jn             | jn                  | jn             |
| Teaching                                                          | jn                | jn            | jn               | jn                   | jn             | jn                  | jn             |
| Time management                                                   | jn                | jn            | jn               | jn                   | jn             | jn                  | jn             |

# Mass General Mentorship Pilot Program Survey--

\* 8. How satisfied are you that you personally have been mentored in the following areas?

Please note the options include a scale of "not satisfied" to "extremely satisfied." In addition, included are options "too early to tell" and "not applicable"

|                                                                   | too early to tell | not satisfied | mildly satisfied | moderately satisfied | very satisfied | extremely satisfied | not applicable |
|-------------------------------------------------------------------|-------------------|---------------|------------------|----------------------|----------------|---------------------|----------------|
| Ability to give feedback                                          | jn                | jn            | jn               | jn                   | jn             | jn                  | jn             |
| Ability to receive feedback                                       | jn                | jn            | jn               | jn                   | jn             | jn                  | jn             |
| Academic promotion                                                | jn                | jn            | jn               | jn                   | jn             | jn                  | jn             |
| Balancing work and family life                                    | jn                | jn            | jn               | jn                   | jn             | jn                  | jn             |
| Career planning and advice                                        | jn                | jn            | jn               | jn                   | jn             | jn                  | jn             |
| Career success                                                    | jn                | jn            | jn               | jn                   | jn             | jn                  | jn             |
| Clinical skills                                                   | jn                | jn            | jn               | jn                   | jn             | jn                  | jn             |
| Communication skills                                              | jn                | jn            | jn               | jn                   | jn             | jn                  | jn             |
| Increasing your visibility                                        | jn                | jn            | jn               | jn                   | jn             | jn                  | jn             |
| Integrating research and clinical activities                      | jn                | jn            | jn               | jn                   | jn             | jn                  | jn             |
| Job satisfaction                                                  | jn                | jn            | jn               | jn                   | jn             | jn                  | jn             |
| Knowledge about the HMS and MGH organizational system and culture | jn                | jn            | jn               | jn                   | jn             | jn                  | jn             |
| Leadership skills                                                 | jn                | jn            | jn               | jn                   | jn             | jn                  | jn             |
| Learning how to be a mentor/mentoring skills                      | jn                | jn            | jn               | jn                   | jn             | jn                  | jn             |
| Networking                                                        | jn                | jn            | jn               | jn                   | jn             | jn                  | jn             |
| Opportunities for self reflection                                 | jn                | jn            | jn               | jn                   | jn             | jn                  | jn             |
| Professional connectedness                                        | jn                | jn            | jn               | jn                   | jn             | jn                  | jn             |
| Scientific research/grant writing                                 | jn                | jn            | jn               | jn                   | jn             | jn                  | jn             |
| Self confidence                                                   | jn                | jn            | jn               | jn                   | jn             | jn                  | jn             |
| Teaching                                                          | jn                | jn            | jn               | jn                   | jn             | jn                  | jn             |
| Time management                                                   | jn                | jn            | jn               | jn                   | jn             | jn                  | jn             |

# Mass General Mentorship Pilot Program Survey--

\* 9. To what extent do you agree you personally have achieved the following in your career?

|                                                                   | too early to tell | strongly disagree | disagree | neither agree nor disagree | agree | strongly agree | not applicable |
|-------------------------------------------------------------------|-------------------|-------------------|----------|----------------------------|-------|----------------|----------------|
| Ability to give feedback                                          | jn                | jn                | jn       | jn                         | jn    | jn             | jn             |
| Ability to receive feedback                                       | jn                | jn                | jn       | jn                         | jn    | jn             | jn             |
| Academic promotion                                                | jn                | jn                | jn       | jn                         | jn    | jn             | jn             |
| Balancing work and family life                                    | jn                | jn                | jn       | jn                         | jn    | jn             | jn             |
| Career planning and advice                                        | jn                | jn                | jn       | jn                         | jn    | jn             | jn             |
| Career success                                                    | jn                | jn                | jn       | jn                         | jn    | jn             | jn             |
| Clinical skills                                                   | jn                | jn                | jn       | jn                         | jn    | jn             | jn             |
| Communication skills                                              | jn                | jn                | jn       | jn                         | jn    | jn             | jn             |
| Increased visibility                                              | jn                | jn                | jn       | jn                         | jn    | jn             | jn             |
| Integrating research and clinical activities                      | jn                | jn                | jn       | jn                         | jn    | jn             | jn             |
| Job satisfaction                                                  | jn                | jn                | jn       | jn                         | jn    | jn             | jn             |
| Knowledge about the HMS and MGH organizational system and culture | jn                | jn                | jn       | jn                         | jn    | jn             | jn             |
| Leadership skills                                                 | jn                | jn                | jn       | jn                         | jn    | jn             | jn             |
| Learning how to be a mentor/mentoring skills                      | jn                | jn                | jn       | jn                         | jn    | jn             | jn             |
| Networking                                                        | jn                | jn                | jn       | jn                         | jn    | jn             | jn             |
| Opportunities for self reflection                                 | jn                | jn                | jn       | jn                         | jn    | jn             | jn             |
| Professional connectedness                                        | jn                | jn                | jn       | jn                         | jn    | jn             | jn             |
| Scientific research/grant writing                                 | jn                | jn                | jn       | jn                         | jn    | jn             | jn             |
| Self confidence                                                   | jn                | jn                | jn       | jn                         | jn    | jn             | jn             |
| Teaching                                                          | jn                | jn                | jn       | jn                         | jn    | jn             | jn             |
| Time management                                                   | jn                | jn                | jn       | jn                         | jn    | jn             | jn             |

# Mass General Mentorship Pilot Program Survey--

10. To what extent do you agree the following are present at work?

Please note the options include a scale of "strongly disagree" to "strongly agree." In addition, included are options "too early to tell" and "not applicable"

|                                                               | too early to tell | strongly disagree | disagree | neither agree nor disagree | agree | strongly agree | not applicable |
|---------------------------------------------------------------|-------------------|-------------------|----------|----------------------------|-------|----------------|----------------|
| Environment that promotes a culture of mentorship             | jn                | jn                | jn       | jn                         | jn    | jn             | jn             |
| Environment that promotes feedback and sharing of information | jn                | jn                | jn       | jn                         | jn    | jn             | jn             |
| Environment that promotes visibility                          | jn                | jn                | jn       | jn                         | jn    | jn             | jn             |
| Environment that provides actionable advice and guidance      | jn                | jn                | jn       | jn                         | jn    | jn             | jn             |
| Knowledge of available departmental information               | jn                | jn                | jn       | jn                         | jn    | jn             | jn             |
| Knowledge of how to access departmental resources             | jn                | jn                | jn       | jn                         | jn    | jn             | jn             |
| Someone to turn to in case of difficulty                      | jn                | jn                | jn       | jn                         | jn    | jn             | jn             |

# Mass General Mentorship Pilot Program Survey--

\* 11. To what extent do you agree the following are challenges to a mentoring relationship?

Please note the options include a scale of "strongly disagree" to "strongly agree." In addition, included at are options "too early to tell" and "not applicable"

|                                                                                  | too early to tell | strongly disagree | disagree | neither agree nor disagree | agree | strongly agree | not applicable |
|----------------------------------------------------------------------------------|-------------------|-------------------|----------|----------------------------|-------|----------------|----------------|
| Different goals                                                                  | jn                | jn                | jn       | jn                         | jn    | jn             | jn             |
| Generational differences                                                         | jn                | jn                | jn       | jn                         | jn    | jn             | jn             |
| Giving honest feedback                                                           | jn                | jn                | jn       | jn                         | jn    | jn             | jn             |
| Lack of perceived confidentiality                                                | jn                | jn                | jn       | jn                         | jn    | jn             | jn             |
| Mentor's lack of time                                                            | jn                | jn                | jn       | jn                         | jn    | jn             | jn             |
| Perception that your mentor might have a role in evaluating your job performance | jn                | jn                | jn       | jn                         | jn    | jn             | jn             |
| Personality conflict                                                             | jn                | jn                | jn       | jn                         | jn    | jn             | jn             |
| Receiving honest feedback                                                        | jn                | jn                | jn       | jn                         | jn    | jn             | jn             |
| Mentor's lack of experience                                                      | jn                | jn                | jn       | jn                         | jn    | jn             | jn             |
| Your lack of time                                                                | jn                | jn                | jn       | jn                         | jn    | jn             | jn             |

\* 12. If you were to make suggestions in designing a mentorship program, how important are the following in matching mentees with mentors?

|                                    | too early to tell | not important | mildly important | moderately important | very important | extremely important | not applicable |
|------------------------------------|-------------------|---------------|------------------|----------------------|----------------|---------------------|----------------|
| Ability to choose one's own mentor | jn                | jn            | jn               | jn                   | jn             | jn                  | jn             |
| Ability to choose one's own mentee | jn                | jn            | jn               | jn                   | jn             | jn                  | jn             |
| Administrative interests           | jn                | jn            | jn               | jn                   | jn             | jn                  | jn             |
| Age                                | jn                | jn            | jn               | jn                   | jn             | jn                  | jn             |
| Alignment of goals                 | jn                | jn            | jn               | jn                   | jn             | jn                  | jn             |
| Gender                             | jn                | jn            | jn               | jn                   | jn             | jn                  | jn             |
| Marital status                     | jn                | jn            | jn               | jn                   | jn             | jn                  | jn             |
| Parental status                    | jn                | jn            | jn               | jn                   | jn             | jn                  | jn             |
| Personality                        | jn                | jn            | jn               | jn                   | jn             | jn                  | jn             |
| Research interests                 | jn                | jn            | jn               | jn                   | jn             | jn                  | jn             |
| Specialty/Subspecialty             | jn                | jn            | jn               | jn                   | jn             | jn                  | jn             |

## Mass General Mentorship Pilot Program Survey--

\* 13. Please rate the extent to which you agree with the following statement:

by encouraging mentorship, the Mass General and my department would show they value my own professional development

too early to tell

strongly disagree

disagree

neither agree nor disagree

agree

strongly agree

not applicable

\* 14. To what extent do you agree that you are supported, in general?

too early to tell

strongly disagree

disagree

neither agree nor disagree

agree

strongly agree

not applicable

# Mass General Mentorship Pilot Program Survey--

\* 15. Please rate the extent to which you agree the following statements describe your department at this time:

|                                                                                                      | too early to tell | strongly disagree | disagree | neither agree nor disagree | agree | strongly agree | not applicable |
|------------------------------------------------------------------------------------------------------|-------------------|-------------------|----------|----------------------------|-------|----------------|----------------|
| Allocation of rewards by your department is linked to measures of individual faculty performance.    | jn                | jn                | jn       | jn                         | jn    | jn             | jn             |
| Faculty in your department are committed to the decisions made in the department.                    | jn                | jn                | jn       | jn                         | jn    | jn             | jn             |
| Faculty in your department are not distracted by continual shifts in policy or objectives.           | jn                | jn                | jn       | jn                         | jn    | jn             | jn             |
| Faculty in your department feel they are part of a close-knit team.                                  | jn                | jn                | jn       | jn                         | jn    | jn             | jn             |
| Faculty in your department share information.                                                        | jn                | jn                | jn       | jn                         | jn    | jn             | jn             |
| Faculty in your department strive to support each other.                                             | jn                | jn                | jn       | jn                         | jn    | jn             | jn             |
| Faculty who are not academically and/or clinically productive are not successful in your department. | jn                | jn                | jn       | jn                         | jn    | jn             | jn             |
| In your department, individual faculty performance is monitored against written objectives.          | jn                | jn                | jn       | jn                         | jn    | jn             | jn             |
| In your department, there is an emphasis on innovative/new/cutting edge activities.                  | jn                | jn                | jn       | jn                         | jn    | jn             | jn             |
| In your department, there is an emphasis on measurement of individual faculty performance.           | jn                | jn                | jn       | jn                         | jn    | jn             | jn             |
| In your department, your work is consistent with your expectations.                                  | jn                | jn                | jn       | jn                         | jn    | jn             | jn             |
| Your department is open to change.                                                                   | jn                | jn                | jn       | jn                         | jn    | jn             | jn             |

# Mass General Mentorship Pilot Program Survey--

In order to send your gift card, please enter your Partners Username and your interoffice mailing address in the fields below.

Please note that this information will be kept confidential.

16. Partners Username (for example ZZX34):

17. Interoffice mailing address:

Building

Floor

Suite
